# Supplementary material
Source: publisher figshare collection journal article supplement (https://acs.figshare.com/ndownloader/files/9592858)
Supplement: Supplementary file 1 [file 9592858]

# **Continuous sorting of cells based on differential P selectin glycoprotein ligand expression using molecular adhesion**

Bushra Tasadduq,<sup>p, °</sup> Brynn McFarland,<sup>±</sup> Muhymin Islam,<sup>§</sup> Alexander Alexeev,<sup>§</sup> A. Fatih Sarioglu,<sup>p</sup> and Todd Sulchek<sup>§, †, \*</sup>

<sup>p</sup> The School of Electrical and Computer Engineering, Georgia Institute of Technology Atlanta GA

<sup>°</sup> NED University of Engineering & Technology, Karachi Pakistan

<sup>±</sup> Department of Chemical and Biomolecular Engineering, Georgia Institute of Technology, Atlanta GA

<sup>§</sup> Woodruff School of Mechanical Engineering, Georgia Institute of Technology, Atlanta GA

<sup>†</sup> Wallace H Coulter Department of Biomedical Engineering, Georgia Institute of Technology, Atlanta GA

This supporting information comprises of following figures

1. Cell size distribution of HL60 cell line
2. Demonstrating degree of attachment/ detachment of P selectin to the device surface after flow experiment.

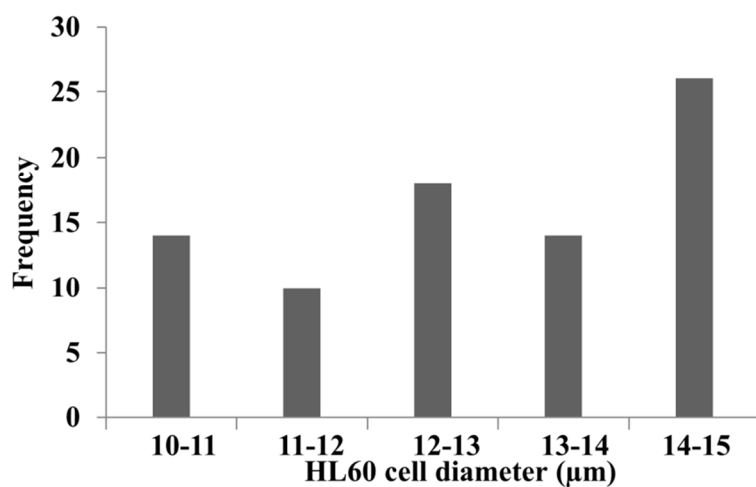

Figure S-1. HL60 cell size distribution

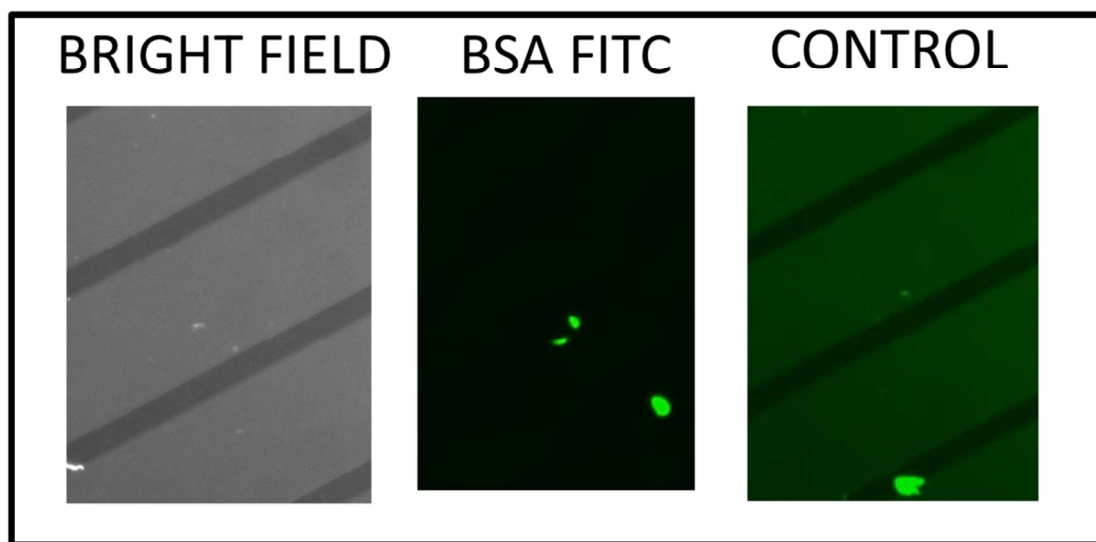

Figure S-2. FITC BSA is used to determine the degree of detachment of immobilized P selectin after flow experiment. Control is the device without P selectin immobilization and treated with FITC BSA. It shows the non-specific attachment in terms of fluorescence. The device after the flow experiment (middle figure) shows no fluorescence and hence P selectin is intact after flow experiment which is important for proper device operation.
